# Supplementary material
Source: Springer Nature journal article supplement (http://www.springermedizin.de/resource/supplementary/12958_2009_545_MOESM7_ESM.pdf/9568272)
Supplement: MOESM7 [file 9568272]

**TABLE 2.**

| Ovarian hormones       | CON<br>(ng/ml)<br>n=6 | NC<br>(ng/ml)<br>n=6 | 2#<br>(ng/ml)<br>n=6 |
|------------------------|-----------------------|----------------------|----------------------|
| Androstenedione        | 0.43±0.19             | 0.94±0.012           | 0.33±0.076           |
| 17-hydroxyprogesterone | 2.56±0.44             | 1.94±0.18            | 1.76±0.13            |
| Testosterone           | 3.14±0.23             | 3.63±0.23            | 2.85±0.13            |
| Progesterone           | 31.52±2.96            | 34.98±2.68           | 20.41±1.02*          |
